# Supplementary figures and images for: Real-world Medicare Healthcare Costs of Patients with Dupuytren’s Contracture Treated with Collagenase or Fasciectomy
Source: PubMed Central journal article supplement — Plast Reconstr Surg Glob Open. 2022 Aug 18;10(8):e4480. doi: 10.1097/GOX.0000000000004480 (PMC9390814; doi:10.1097/gox.0000000000004480), 2022-08-18

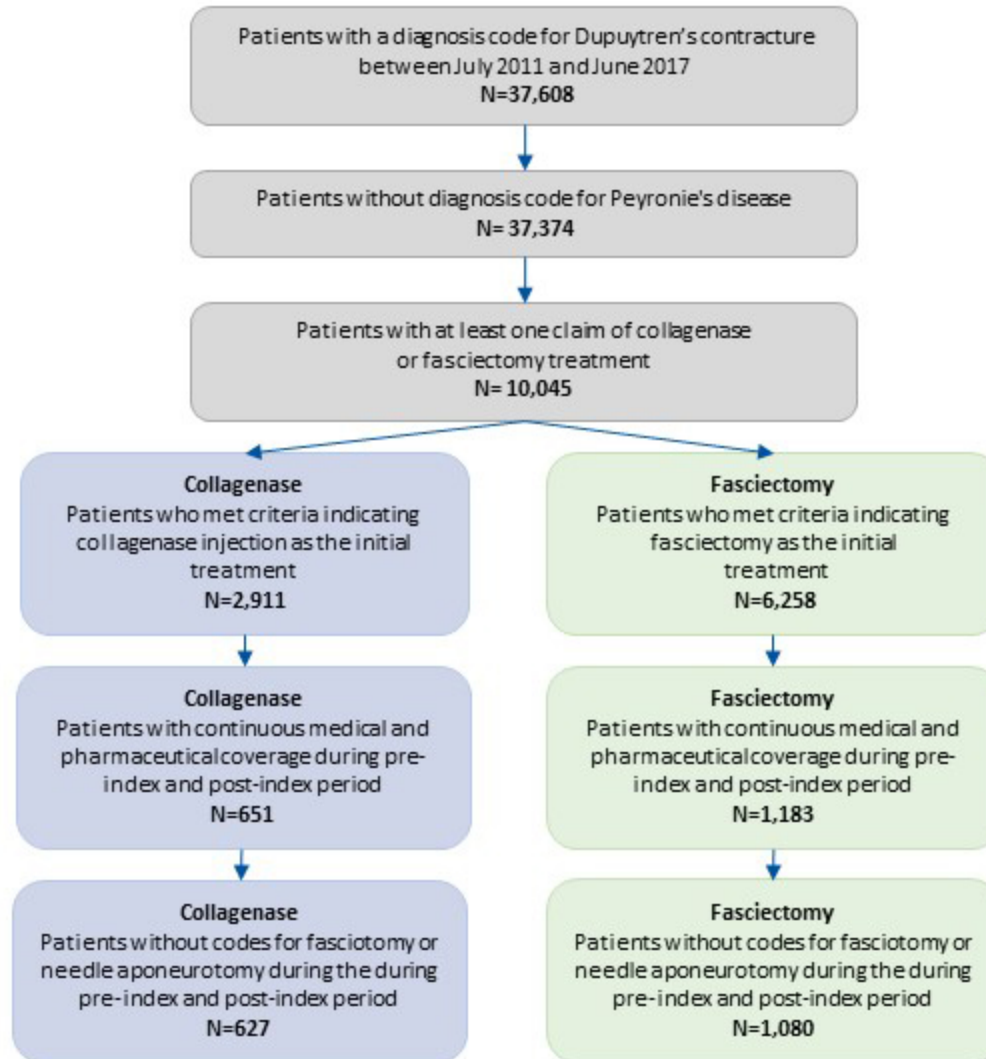

Supplement: gox-10-e4480-s001.pdf [file gox-10-e4480-s001.pdf]
